# Supplementary material
Source: MDPI journal article supplement (https://www.mdpi.com/1424-2818/13/11/572)
Supplement: s1 [file s1]

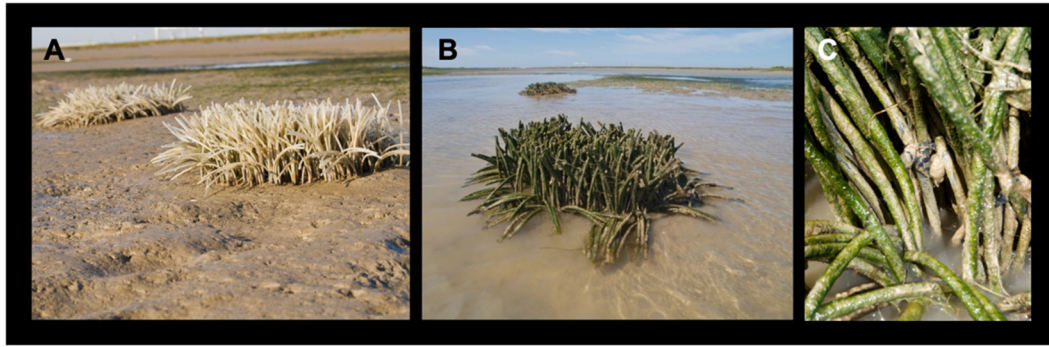

**Figure S1.** Images of the mimic set-up in Rio San Pedro. (A) General image at the beginning of the experiment. (B) General image after the experiment. Some natural *Zostera noltei* meadows can be seen nearby in A and B. (C) Detail of mimics with egg masses of the cuttlefish *Sepia officinalis*.
